# Supplementary material for: CAMKII-conditional deletion of histone deacetylase 2 potentiates acute methamphetamine-induced expression of immediate early genes in the mouse nucleus accumbens
Source: PubMed Central journal article supplement (PMC4547138; doi:10.1038/srep13396), 2015-08-24
Supplement: srep13396-s1.pdf [file srep13396-s1.pdf]

**CAMKII-conditional deletion of histone deacetylase 2 potentiates acute methamphetamine-induced expression of immediate early genes in the mouse nucleus accumbens**

Oscar V. Torres, Ph.D. <sup>1</sup>, Michael T. McCoy, M.S. <sup>1</sup>, Bruce Ladenheim, B.S. <sup>1</sup>, Subramanian Jayanthi, Ph.D. <sup>1</sup>, Christie Brannock, MBA<sup>1</sup>, Ingrid Tulloch, Ph.D. <sup>2</sup>, Irina N. Krasnova, Ph.D. <sup>1</sup>, and Jean Lud Cadet, M.D. <sup>1\*</sup>

<sup>1</sup>Molecular Neuropsychiatry Research Branch, DHHS/NIH/NIDA Intramural Research Program, 251 Bayview Boulevard, Baltimore, MD 21224 and <sup>2</sup>Department of Psychology, Stevenson University, Stevenson, MD 21283.

| Symbol  | Fold change | Definition                                 | Function                                                                       |
|---------|-------------|--------------------------------------------|--------------------------------------------------------------------------------|
| Tcam1   | 8.64        | testicular cell adhesion molecule 1        | encodes testis-specific cell adhesion proteins for germ cell interactions      |
| Olf571  | 8.63        | olfactory receptor 571                     | recognition of odorant signals by G protein-mediated transduction              |
| Nek11   | 8.62        | never in mitosis gene related kinase 11    | DNA replication and response to genotoxic stress                               |
| Rfx4    | 7.79        | regulatory factor X, 4                     | influences HLA class II expression                                             |
| Thbd    | 7.75        | thrombomodulin                             | endothelial-specific type I membrane receptor that binds thrombin              |
| Pde6g   | 6.82        | phosphodiesterase 6G                       | regulates G-protein-coupled receptor kinase 2                                  |
| Mtnr1a  | 6.06        | melatonin receptor 1A                      | G-protein coupled melatonin receptor involved in circadian rhythm              |
| Csf3r   | 5.54        | colony stimulating factor 3 receptor       | controls production and function of granulocytes                               |
| Angptl4 | 2.09        | angiopoietin-like 4                        | regulation of glucose homeostasis, lipid metabolism, and insulin sensitivity   |
| Cnn2    | 2.03        | calponin 2                                 | regulation and modulation of smooth muscle contraction                         |
| Olf800  | -2.90       | olfactory receptor 800                     | interact with odorant molecules to initiate the perception of a smell          |
| Dip2b   | -3.21       | DIP2 disco-interacting protein 2 homolog B | encoded protein for DNA methyltransferase binding site                         |
| Rab19   | -3.58       | member RAS oncogene family 19              | important for intracellular transport                                          |
| C3ar1   | -3.64       | complement component 3a receptor 1         | receptor for the inflammatory peptide anaphylatoxin C3a                        |
| Wnt2b   | -3.76       | wingless related MMTV integration site 2b  | signaling factors for the regulation of cell growth and differentiation        |
| Olf192  | -3.78       | olfactory receptor 192                     | interact with odorant molecules to initiate the perception of a smell          |
| Lamc2   | -4.82       | laminin, gamma 2                           | extracellular glycoprotein involved in cell adhesion, migration, and signaling |
| Rin2    | -4.92       | Ras and Rab interactor 2                   | functions as a guanine nucleotide exchange factor for the RAB5 protein         |
| Tnpo1   | -7.60       | transportin 1, transcript variant 1        | formation of karyopherin receptors for localization of nuclear proteins        |

**A. fosB**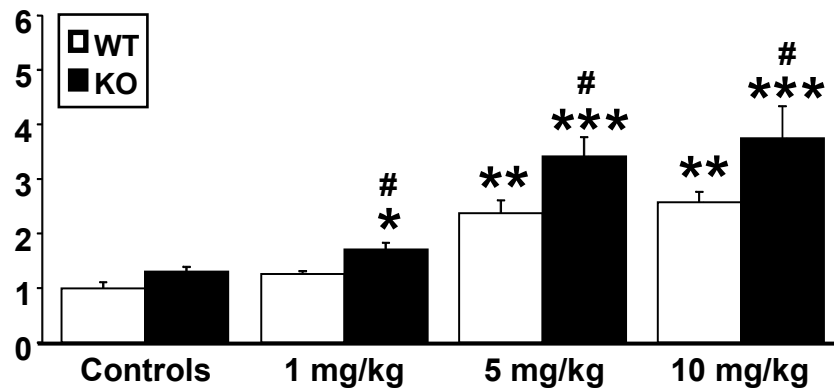**D. Egr1**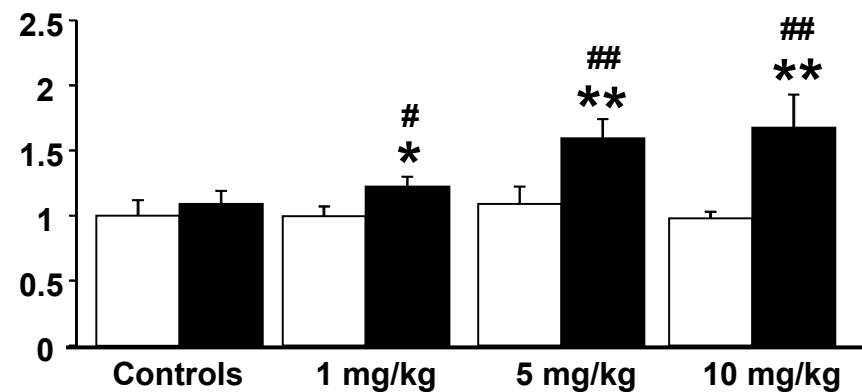**B. fra2**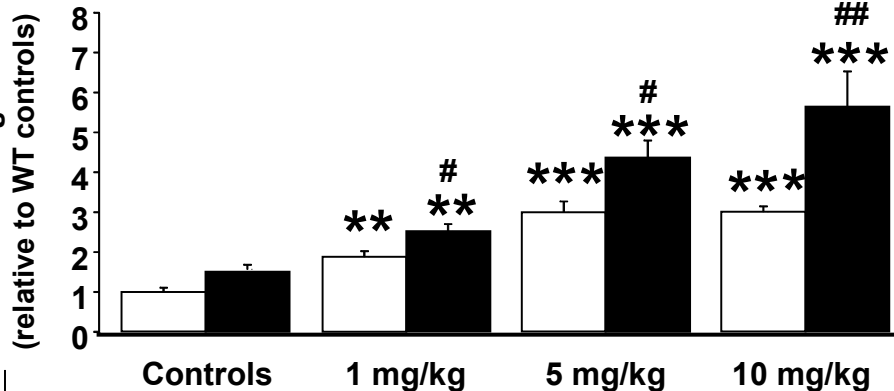**E. Egr3**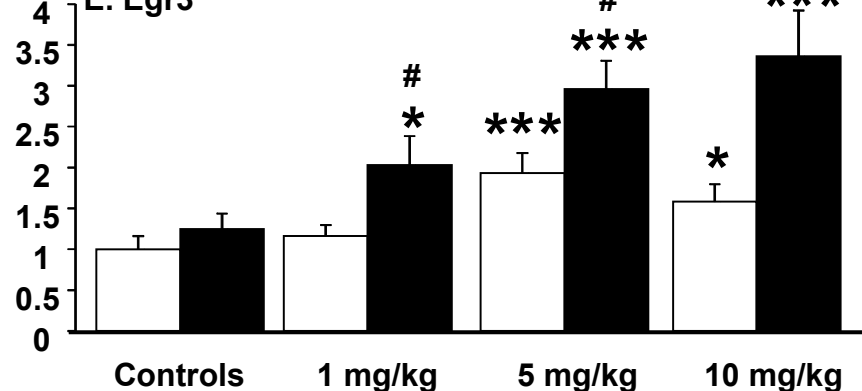**C. junB**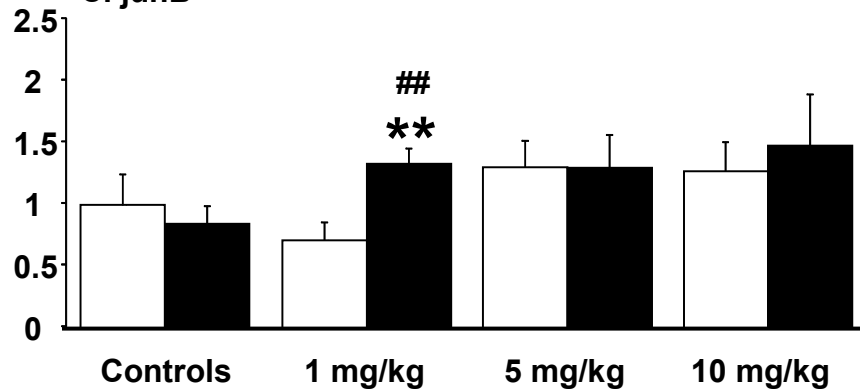**F. Nr4a1**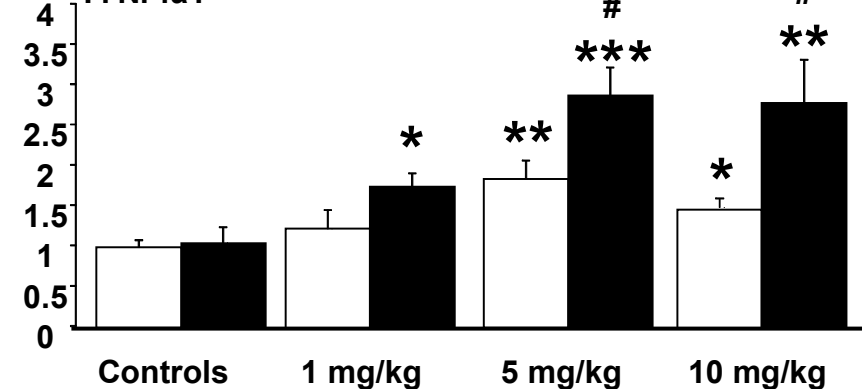

### Supplementary Table 1

List of 39 genes that were altered by deletion of neuronal HDAC2 in the mouse NAc. The table shows up- and down-regulated genes in HDAC2KO mice relative to WT mice as assessed by MouseRef-8 BeadChips arrays with 25,697 gene probes. Moreover, the table shows that HDCA2 loss was not associated with changes in the expression IEGs of interest. There were 4 animals per group for the microarray experiments.

### Supplementary Figure 1

Lower doses of METH caused differences in IEG expression between WT and HDAC2KO mice. Separate groups of WT and HDAC2KO mice were injected with a single dose of METH (1, 5, or 10 mg/kg) or saline and sacrificed 2 hours later. Quantitative PCR shows increased METH-induced expression of (A) *Fosb*, (B) *Fra2*, (D) *Egr1*, (E) *Egr3* and (D) *Nr4a1* in NAc of HDAC2KO mice relative to WT mice. These results are similar to our observations with a moderate dose of METH (20 mg/kg), and further validate the METH-induced higher expression of these genes in HDAC2KO mice at the 2 hour time point. The relative amounts of transcripts were normalized to *Oaz1* and expressed as fold-changes in comparison to WT saline-injected mice. The data are represented as means  $\pm$  SEM (N = 10 mice per group per METH dose). Statistical analyses were performed using paired t-test for each separate dose relative to controls or between respective genotypes. Key to statistics; \* =  $p < 0.05$ ; \*\* =  $p < 0.01$ ; \*\*\* =  $p < 0.001$ , in comparison to respective controls; # =  $p < 0.05$ ; ## =  $p < 0.01$ , in comparison to respective METH-treated WT mice.
